# Supplementary material for: Candidate Genes from an FDA-Approved Algorithm Fail to Predict Opioid Use Disorder Risk in Over 450,000 Veterans
Source: PubMed Central journal article supplement — medRxiv. 2024 May 16:2024.05.16.24307486. Preprint. [Version 1] doi: 10.1101/2024.05.16.24307486 (PMC11118646; doi:10.1101/2024.05.16.24307486), 2024-05-16
Supplement: media-2.pdf [file media-2.pdf]

**Supplementary Figure 2.** Scatter plot of the first two ancestry principal components among opioid exposed individuals.

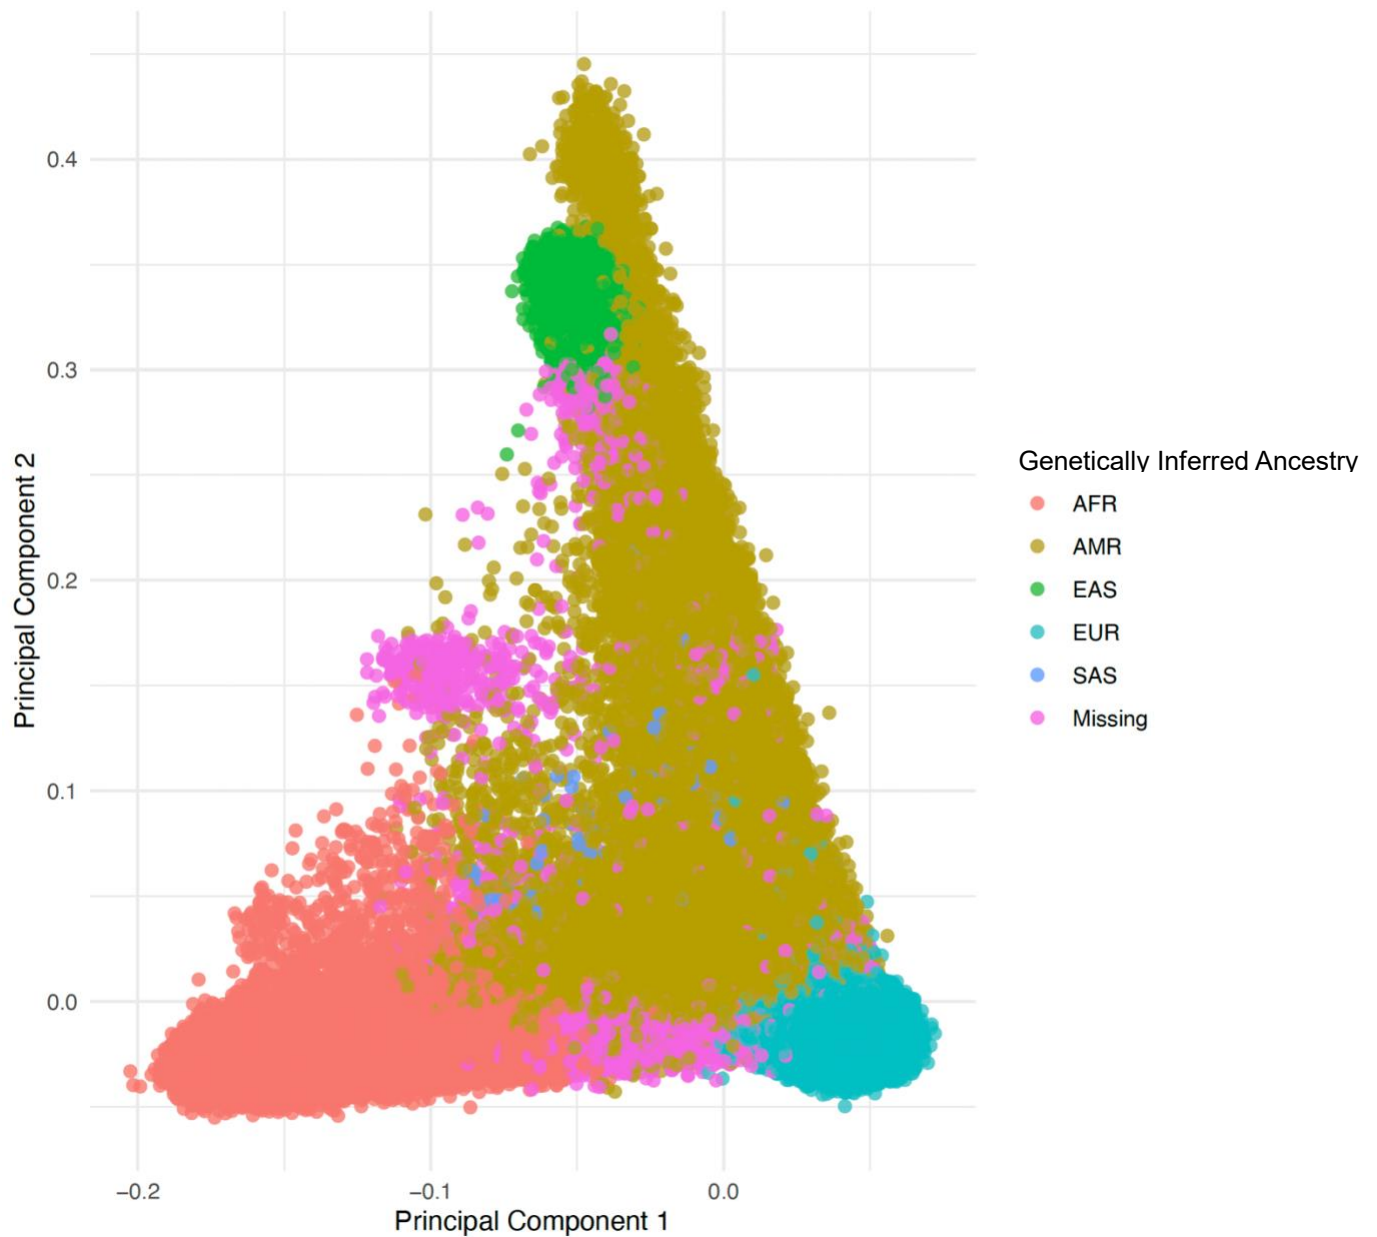

AFR = individuals genetically similar to the African superpopulation, AMR = individuals genetically similar to the admixed American superpopulation, EAS = individuals genetically similar to the East Asian superpopulation, EUR = individuals genetically similar to the European superpopulation, SAS = individuals genetically similar to the South Asian superpopulation. Individuals missing on genetically inferred ancestry were unable to be classified with a predicted probability over 50% to any given cluster based on their genetic similarity.
