# Supplementary material for: Candidate Genes from an FDA-Approved Algorithm Fail to Predict Opioid Use Disorder Risk in Over 450,000 Veterans
Source: PubMed Central journal article supplement — medRxiv. 2024 May 16:2024.05.16.24307486. Preprint. [Version 1] doi: 10.1101/2024.05.16.24307486 (PMC11118646; doi:10.1101/2024.05.16.24307486), 2024-05-16
Supplement: media-3.pdf [file media-3.pdf]

**Supplementary Figure 1.** Alternate allele frequency across inferred ancestry groups in the Million Veteran Program participants.

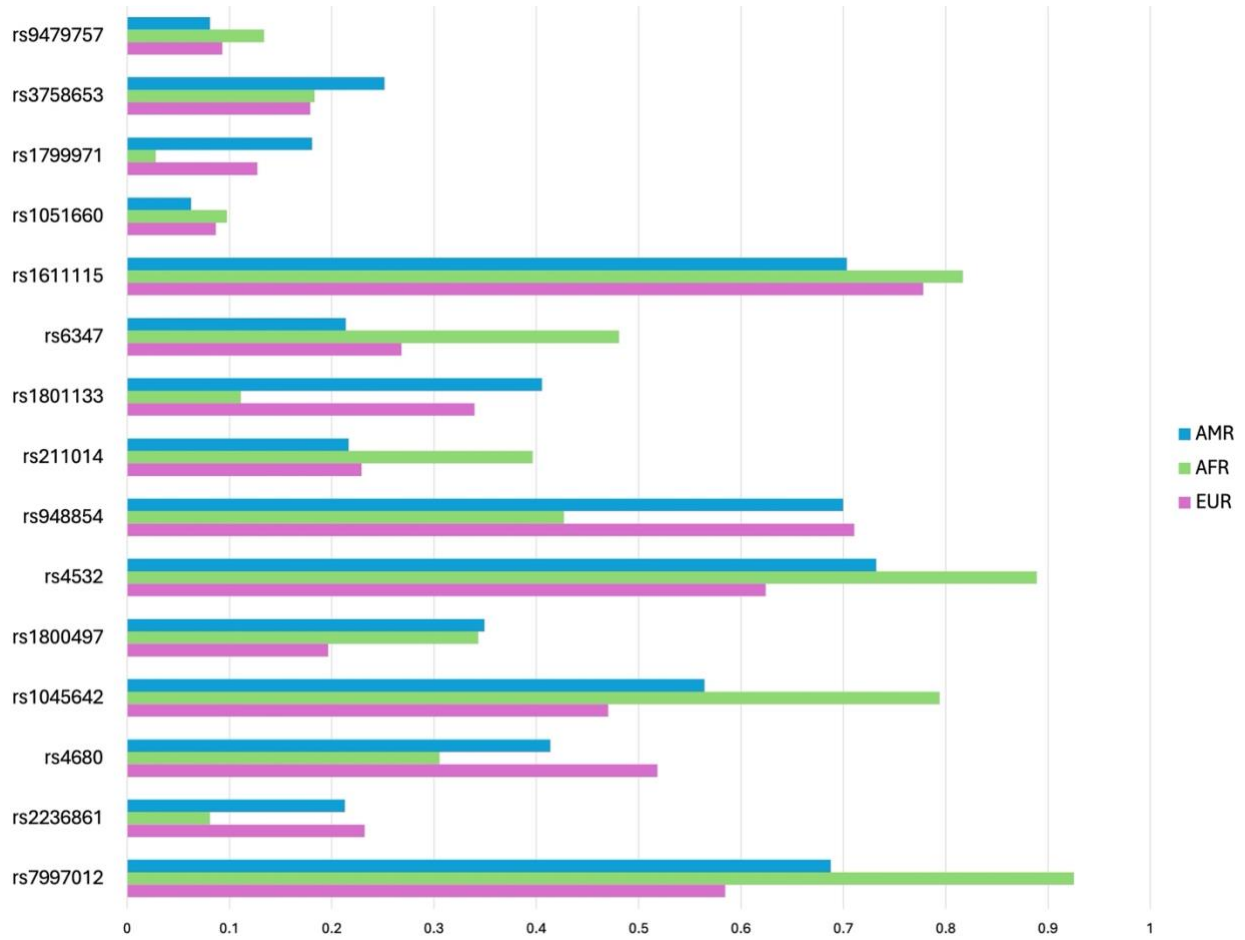

Inferred ancestry was assigned based on genetic similarity to superpopulations defined by the 1000 Genomes Project. AMR = admixed American, AFR = African, EUR = European.
